# Supplementary material for: Reversible zinc phthalocyanine fullerene ensembles
Source: Royal Society of Chemistry journal article supplement (doi:10.1039/b208516j), 2002-01-01
Supplement: b208516j.doc [file b208516j.doc]

**Supporting Spectrum S1**

**Figure S1:** Triplet-triplet features of **ZnPc** (**1a**) recorded 50 ns after a 8 ns laser pulse (337 nm excitation wavelength) with a deoxygenated toluene solution (~ 10-5 M)

**Supporting Spectrum S2**

**Figure S2:** Radical pair features of **ZnPc-L1** recorded 50 ns after a 8 ns laser pulse (337 nm excitation wavelength) with a deoxygenated dichloromethane solution (~ 10-5 M).
